# Supplementary material for: Psychosocial Disadvantage During Childhood and Midlife Health: NIMHD Social Epigenomics Program
Source: PubMed Central journal article supplement (PMC11287423; doi:10.1001/jamanetworkopen.2024.21841), 2024-07-29
Supplement: jamanetwopen-e2421841-s002.pdf [file jamanetwopen-e2421841-s002.pdf]

## Data Sharing Statement

Brown. Psychosocial Disadvantage During Childhood and Midlife Health. *JAMA Netw Open*. Published July 29, 2024. doi:10.1001/jamanetworkopen.2024.21841

### Data

**Data available:** Yes

**Data types:** Deidentified participant data, Data dictionary

**How to access data:** [ryan.l.brown@ttu.edu](mailto:ryan.l.brown@ttu.edu)

**When available:** With publication

### Supporting Documents

**Document types:** Statistical/analytic code

**How to access documents:** [ryan.l.brown@ttu.edu](mailto:ryan.l.brown@ttu.edu)

**When available:** With publication

### Additional Information

**Who can access the data:** Researchers whose proposed use of the data has been approved by the NGHS study team.

**Types of analyses:** For any reasonable purpose.

**Mechanisms of data availability:** After approval of a proposal or written statement of intent.
